# Supplementary material for: Influence of Grape Pomace Intake on Nutritional Value, Lipid Oxidation and Volatile Profile of Poultry Meat
Source: MDPI journal article supplement (doi:10.3390/foods9040508), 2020-04-17
Supplement: s1 [file s1]

**Supplementary Table 1.** Ingredients and chemical composition of finisher diets administered to chicken belonging to the control group (CG) and chicken fed the dietary grape pomace supplementation of 2.5 % (EG1), 5 % (EG2) and 7 % (EG3).

|                                             | Diet |      |      |      |
|---------------------------------------------|------|------|------|------|
|                                             | CG   | EG1  | EG2  | EG3  |
| <b>Ingredients (%)</b>                      |      |      |      |      |
| corn flour                                  | 52.0 | 52.0 | 52.0 | 50.0 |
| soy flour                                   | 32.0 | 32.0 | 32.0 | 32.0 |
| wheat flour                                 | 8.50 | 6.00 | 3.50 | 3.50 |
| vegetable oil                               | 2.50 | 2.50 | 2.50 | 2.50 |
| gluten corn                                 | 2.00 | 2.00 | 2.00 | 2.00 |
| GP                                          | -    | 2.50 | 5.00 | 7.00 |
| Minerals                                    | 3.00 | 3.00 | 3.00 | 3.00 |
| <b>Chemical Composition (%)<sup>1</sup></b> |      |      |      |      |
| Dry matter                                  | 85.7 | 85.5 | 83.5 | 81.9 |
| crude protein                               | 24.3 | 24.1 | 24.5 | 25.1 |
| lipid                                       | 6.53 | 6.52 | 6.53 | 6.55 |
| crude fiber                                 | 5.25 | 5.22 | 6.04 | 6.76 |
| starch                                      | 45.2 | 45.1 | 44.6 | 43.8 |
| ash                                         | 6.81 | 6.77 | 7.20 | 7.60 |

<sup>1</sup> Data are reported on a dry matter (DM) basis. GP = grape pomace
