# Supplementary material for: Influence of Grape Pomace Intake on Nutritional Value, Lipid Oxidation and Volatile Profile of Poultry Meat
Source: MDPI journal article supplement (doi:10.3390/foods9040508), 2020-04-17
Supplement: s1 [file s1]

**Supplementary Table 2.** Body weight (BW) and feed conversion ratio (FCR) evaluated after 1, 7, 14, 21, 28, 35, 42 and 49 days of age for chicken belonging to the control group (CG) and chicken fed the dietary grape pomace supplementation of 2.5 % (EG1), 5 % (EG2) and 7 % (EG3).

| age<br>(days) | Parameter       | CG           | EG1          | EG2          | EG3          |
|---------------|-----------------|--------------|--------------|--------------|--------------|
| 1             | BW <sup>1</sup> | 53 ± 0.86    | 53 ± 1.13    | 54 ± 1.35    | 55 ± 2.53    |
|               | FCR             | -            | -            | -            | -            |
| 7             | BW <sup>1</sup> | 181.8 ± 10.2 | 183.5 ± 11.2 | 182.5 ± 12.2 | 183.9 ± 12.6 |
|               | FCR             | 0.887        | 0.869        | 0.881        | 0.885        |
| 14            | BW <sup>1</sup> | 472.7 ± 10.7 | 470.6 ± 17.1 | 471.1 ± 15.2 | 472.3 ± 13.8 |
|               | FCR             | 1.152        | 1.159        | 1.148        | 1.151        |
| 21            | BW <sup>1</sup> | 923.5 ± 16.9 | 921.7 ± 14.7 | 917.9 ± 16.4 | 919.6 ± 16.3 |
|               | FCR             | 1.306        | 1.311        | 1.308        | 1.307        |
| 28            | BW <sup>1</sup> | 1509 ± 76    | 1499 ± 81    | 1503 ± 73    | 1501 ± 79    |
|               | FCR             | 1.440        | 1.441        | 1.446        | 1.445        |
| 35            | BW <sup>1</sup> | 2177 ± 101   | 2172 ± 98    | 2167 ± 104   | 2171 ± 91    |
|               | FCR             | 1.568        | 1.576        | 1.569        | 1.572        |
| 42            | BW <sup>1</sup> | 2871 ± 112   | 2880 ± 145   | 2869 ± 102   | 2866 ± 110   |
|               | FCR             | 1.709        | 1.668        | 1.701        | 1.703        |
| 49            | BW <sup>1</sup> | 3581 ± 141   | 3529 ± 137   | 3601 ± 108   | 3578 ± 145   |
|               | FCR             | 1.807        | 1.832        | 1.814        | 1.797        |

<sup>1</sup> Data are reported as mean values (g) ± standard deviation (SD). BW = body weight; FCR = feed conversion ratio (cumulative feed intake / body weight).
